# Supplementary material for: Aligned carbon nanotube–epoxy composites: the effect of nanotube organization on strength, stiffness, and toughness
Source: Springer Nature journal article supplement (doi:10.1007/s10853-016-0228-6), 2016-08-09
Supplement: MOESM1 [file 10575204]

**Supplementary materials**

**to**

**Aligned carbon nanotube-epoxy composites: the effect of nanotube organization on strength, stiffness, and toughness**

Anastasiia Mikhalchan, Thurid S. Gspann and Alan H. Windle[[1]](#footnote-1)*

Macromolecular Materials Laboratory, Department of Materials Science and Metallurgy, University of Cambridge

27 Charles Babbage Road, Cambridge, CB3 0FS, UK

**CONTENT**

| S1. Experimental settings for X-Ray microtomography tests………………………….. | 2 |
| --- | --- |
| S2. Experimental details for polarized Raman spectroscopy…………………………… | 2 |
| S3. TGA thermograms of CNT assemblies ………………….………………………… | 2 |
| S4. Effect of on-line condensation on the tensile properties of the CNT fibres ……….. | 3 |
| S5. Verification of the CNT weight fractions in the composites ……..……………….. | 5 |
| S6. Evaluation of the CNT density……………………………………………………... | 6 |
| S7. Evaluation of the real volume fraction and void content in a composite…………… | 9 |
| S8. Evaluation of the ‘packing’ efficiency for CNT fibres in the composites………….. | 10 |
| S9. Recent results on high volume fraction epoxy composites…………………………. | 11 |
| S10. Some recent results on CNT fibres/yarns modification…………………………… | 13 |
| S11. Three-point bend test of the T300 carbon fibre-composite……………………...... | 13 |
| **REFERENCES**……………………………………………………………………….. | 14 |

**S1. Experimental settings for X-Ray microtomography tests**

SkyScan 1172 X-Ray microtomography scanner (Bruker) was used for microstructural characterization and 3-D visualization of the composites with source voltage 29 kV, source current 175 µA, image pixel size 0.88 µm, object-to-source distance 33.84 mm, camera-to-source distance 346.258 mm, and exposure 2600 ms. For each sample approximately 2500-2800 row and 3000-3200 column projections were taken with a rotation step of 0.220 °and scan duration of 2.5 h.

SkyScan NRecon program was applied for scan reconstruction, DataViewer program (SkyScan) for 2-D cross-section images processing, and CTvox program (Bruker) was used for 3-D scan visualization, respectively.

**S2. Experimental details for polarized Raman spectroscopy**

To quantitatively characterize the degree of alignment of CNT bundles in mats and fibres, polarized Raman spectra were obtained with a Bruker Senterra Raman microscope using a 785 nm excitation at a power of 10 mW, 10 s integration time, 3 accumulations per spectrum. The Raman spectrometer is equipped with a motorized XY stage without rotation. The measurement positions were stored between measurements to avoid intensity differences by different positions. We used VV and HH polarization (with the first letter referring to the polarization of the incident beam, and the second to the polarization of the scattered beam) keeping the sample in the same position (aligned with the incident beam in V direction), which is equivalent to maintaining VV configuration and rotating the sample by 90 degrees [1, 2]. Before each measurement, the system would autofocus. The maximum intensity ratios of IG0/IG90 (IVV/IHH) were each calculated from averaging a map of 10 positions.

**S3. TGA thermograms of CNT assemblies**

High-resolution TGA thermograms were recorded to control reproducibility of cleanliness and quality of all carbon nanotube assemblies used in this study. Samples of a mass ranged between 3 and 7 mg were heated from room temperature to 1000°C at a dynamic heating rate of maximum value 10°C per minute in a dynamic oxidative atmosphere (air) with a flow rate of 60 mL min-1. The typical CNT decomposition is shown in Fig. S1.

Fig. S1 – TGA –curves of the typical CNT-assembly decomposition in air.

Fig. S1 illustrates decomposition of the typical CNT-sample with the first mass decrease of about 6-7% while heating up to 400°C (removing of amorphous carbon and/or synthesis by-products), followed by two or three main combustion events from 520 to 600°C relative to decomposition of carbon nanotubes of different diameter/number of walls. The residue content, which is relative to the catalyst oxide form, varies from about 1 to 3.7%.

**S4. Effect of on-line condensation on the tensile properties of the CNT fibres**

To understand the tensile behaviour of the CNT assemblies varying with condensation, we tested three different forms, from as-spun uncondensed CNTs mats to CNT filaments fully condensed on-line. The uncondensed CNT mats were collected directly onto a winder without any condensation. By spraying the CNT mat off-line (post synthesis) with acetone, the network condenses out of plane (through the thickness). As long as kept on the winder, the mats cannot be condensed effectively along bundle orientation and in-plane perpendicular to the bundle orientation, hence this condition is considered “semi-condensed”. From the uncondensed and semi-condensed CNT mats 3 mm wide ribbons were cut and weighed prior the tensile test to determine their linear densities.

Comparing the uncondensed and ‘semi-condensed’ CNT mats the main effect by out-of-plane condensation was observed as stiffness increase from 7.6 N/tex to 20.7 N/tex (Fig. S2, Table S1). While bundles slide and align comparatively freely in uncondensed CNT mats before they show the maximum stiffness (Fig. S2, purple line), in ‘semi-condensed’ mats the inter-bundle contact is enhanced leading to a certain decrease of CNT bundle-sliding. This results in an immediate steeper slope and a defined yield point (Fig. S2, green line).


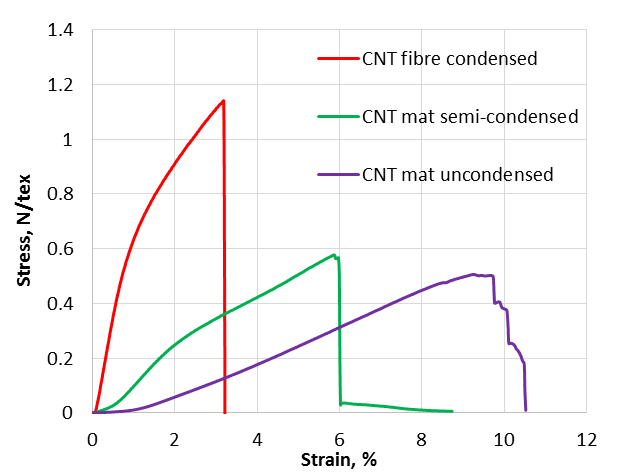


Fig. S2 – Selected typical stress-strain curves at 20 mm gauge length of the on-line condensed CNT fibres (red line), in comparison with off-line ‘semi-condensed’ (green line) and uncondensed CNT mats (purple line), all synthesized at the same conditions.

Table S1. Tensile properties of the CNT fibres and mats

| **Fibre** | **Diameter, um** | **Linear density, tex** | **Strength, N/tex** | **Modulus, N/tex** | **Elongation, %** | **Work of fracture, J/g** |
| --- | --- | --- | --- | --- | --- | --- |
| CNT fibre {highest} [3] | 7 | 0.035 | 2.0 | 90 | 4.0 | 33 |
| CNT fibre  this study | 7 | 0.028 | 1.16 | 55 | 3.8 | 15.73 |
| CNT mat  (semi-condensed) | 3 mm wide | 0.832 | 0.52 | 20.7 | 6.0 | 13.00 |
| CNT mat (uncondensed) | 3 mm wide | 0.964 | 0.48 | 7.6 | 9.6 | 17.30 |

Note though yielding a nearly triple increase in stiffness, off-line condensation yields only about 10%-growth in tensile strength (from 0.48 N/tex for uncondensed to 0.52 N/tex for ‘semi-condensed’ CNT mats), which could be ascribed mainly as the variance of samples rather than the increase in strength. As condensation was conducted post synthesis whilst still on the winder, no external stretching and additional alignment of the CNT bundles was applied. Tensile strength values only reached about 1/3 (one third) of the strength of CNT fibres condensed on-line. Such high levels of strength and stiffness are reachable due to the optimal condensation and alignment during the collection process.

We also should mention, that the spinning parameters were chosen from the balance between material yield from the synthesis process (“easy-spinnability”) and consistency of filament properties, accepting the drawback of not reaching the strongest filaments of 2 N/tex at long gauge length [3] possible to synthesize with our established process.

**S5. Verification of the CNT weight fractions in the composites**

TGA thermograms were recorded to verify the weight fractions of all composites. Samples of a mass ranged between 3 and 7 mg were heated from room temperature to 700 °C at a heating rate of 20 °C per minute in a dynamic oxidative atmosphere (air) with a flowrate of 60 mL min-1. Typical decomposition curves of a CNT-assembly, a composite sample and pure epoxy matrix are combined in Fig. S3.

Fig. S3 – TGA –curves, showing decomposition in air of a typical CNT-assembly (blue lines), a composite sample (red lines) and pure matrix (violet lines). Black dashed lines represent values of a residual weight determined at the reference (selected) temperature.

The temperature of 475 °C was selected as a reference-temperature to calculate the weight fraction of a composite, using the following equation [4]:

(1)

where:

Wf – the filer fraction by weight, %

C – % of the composite residual weight at the selected temperature,

M – % of the polymeric matrix residual weight at the selected temperature,

F – % of the filler residual weight at the selected temperature.

TGA-weight fractions were compared with values calculated for from the known weight of nanotubes incorporated in each composite (during manufacturing) and the final mass of a cured sample. Table S2 summarizes several representative tests.

Table S2. Verification of the weight fractions for composites

| **Sample №** | **Wt % at lay up** | **Wt % by TGA** |
| --- | --- | --- |
| 1 | 49.20 | 48.29 |
| 2 | 64.45 | 65.08 |
| 3 | 46.88 | 48.37 |

Data from the table confirm the accuracy and high level of agreement between obtained results. For all further calculations and discussions in the paper we used the TGA-verified weight fraction values.

**S6. Evaluation of the CNT density**

Previously [5], we have shown that there was no intercalation of the liquid molecules in-between collapsed graphene layers within the CNT bundles, based on our observation of the 002 peak position from WAXS. Thus, having no evidence for the liquid molecules between the (002) planes, we could calculate the density of CNT bundles with the assumption that epoxy does not penetrate them.

The samples were studied by HRTEM with a FEI Tecnai Orisis at 80 keV, particularly commissioned for the investigation of carbonaceous structures. The experimental evidence is that the structures of both the uncondensed CNT mats and the condensed fibres consisted of bundles of almost entirely double-wall CNTs (Fig. S4), with on average 10 nanotubes per bundle. Occasional small diameter single wall tubes and multi walled tubes, but latter did not appear to be incorporated into the bundles. The double wall tubes were collapsed into dumbbell-shape cross sections and had an equivalent outer diameter, if uncollapsed, (measured to the atom centres of the outer wall) of be on average 2.5 nm.


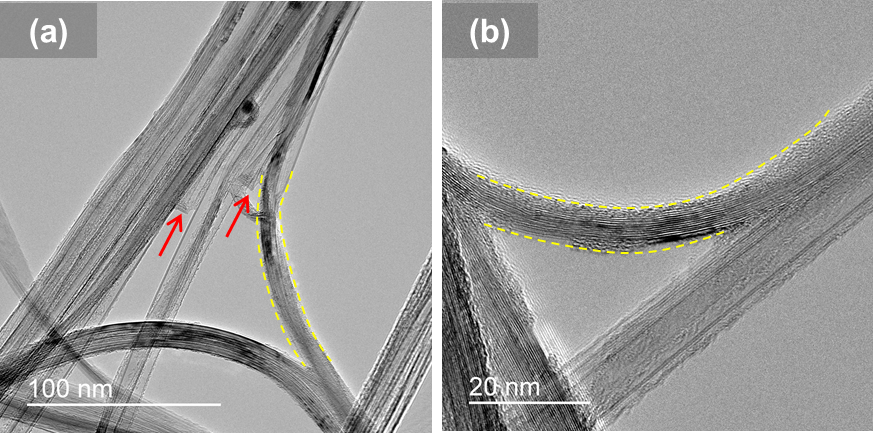


Fig. S4 – HRTEM shows the typical bundle structure (a), with collapsed double-walled tubes turning back on themselves (arrows) and DWCNT bundles twisting, showing both the side view and flat face view of the collapsed CNTs (dotted lines). Higher magnification (b) shows a side view of such a twisting bundle comprised of collapsed tubes showing layer spacing of 0.35 nm.

The geometry of collapsed double wall nanotubes in bundles has been investigated by Vilatela et al. [6] in a paper, which combines experimental observation with Molecular Dynamics modeling. However, although the authors of that paper were especially interested in the percentage of the surface area of a tube in contact with its neighbours, they did not estimate density.

The paper demonstrates that the mean diameter of the curved dumbbell ends is of the order of 2nm, and this value is used as a basis for the simple model of the dumbbell shown in Fig S5.


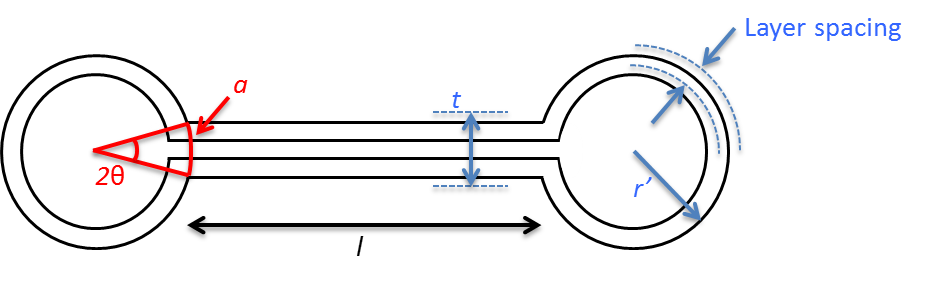


Fig. S5 – Simple model used to estimate the area of a collapsed double-wall nanotube. The ends are not as round as depicted here but the radius used for them is the average of the two orthogonal values seen in micrographs. The value of r’ used was 1.00 nm. *a* is the arc segment length; l and t are the length and thickness of flat central section of dumbbell CNT.

The perimeter of the outer tube is the same as the equivalent tube in the uncollapsed state where it is 2πr, r being its radius. The area of the dumbbell was calculated and expressed as a percentage of the uncollapsed cross section. In each case the envelope was extended by half the graphite layer spacing to account for closest approach limitation with other collapsed nanotubes.

(2)

With average radius of the dumbbell r’, centre thickness of the collapsed tube t, length between the dumbbells l and

(3)

For the uncollapsed state, the packing density (for the envelopes) is taken as (√3/2)*x*, where *x* is the closest approach of neighbours, an assumption of simple hexagonal packing. Assessing such a factor for the packing of collapsed dumbbell cross sections is not so straightforward. On one hand, the regular tessellation of dumbbells is unlikely to be as efficient as circles, although this is balanced by the observations from Vilatela et al. [6], that the collapsed tubes further distort to achieve as efficient packing as possible. For the sake of the estimation here, we have assumed that these two considerations largely cancel out, and the difference in density between the collapsed and uncollapsed states is due only to the differences in the relative cross sectional areas.

(4)

The predicted bundle densities for both collapsed and uncollapsed states are shown in Fig. S6 as a function of the uncollapsed diameter.

Fig. S6 – Bundle densities as a function of CNT diameters if in the uncollapsed (circular) state. Blue corresponds to circular tubes, red to the tubes after collapse.

For the collapsed double wall tubes, which have an equivalent outer diameter, if uncollapsed, of about 2.5 nm, as was observed by TEM analysis, we can assume the density of CNT bundles to be 1.66 g/cm, which value we use in all other related calculations.

**S7. Evaluation of the real volume fraction and void content in a composite**

1) Knowing the weight fraction and density of each component, *the “ideal” volume fraction* (in absence of voids) can be calculated by using the following equation:

(5)

where:

V is the filler fraction by volume %

Vf is the volume of a filler inside a composite (as a ratio of its weight fraction to its density),

Vepoxy is the volume of a matrix inside a composite (as a ratio of its weight fraction to its density)

For all calculations the density of epoxy resin was assumed to be of 1.20 g/cm3, and density of CNTs in the bundles was assumed to be of 1.66 g/cm3.

2) Void content (*Volume fraction of voids)* in a composite can be estimated as the ratio of measured density to its theoretical value:

(6)

where:

ρtest is the apparent density calculated as a ratio of the sample weight to its volume, g/cm3

ρtheoretic is the theoretical density, g/cm3

Apparent density (ρtest) of each composite was calculated as a ratio of the sample weight to its volume, by measuring length, thickness and width by a digital micrometer and mass on the high-precision Sartorius microbalance.

Theoretical density (ρtheoretic) of all composites was calculated by using the rule of mixtures.

3) Knowing the volume of voids in a composite, *the “real” volume fraction* can be calculated assuming that a real composite in any cases contains voids:

(7)

where:

V is the the real filler fraction by volume, %

Vf is the volume of a filler inside a composite,

Vepoxy is the volume of a matrix inside a composite,

Vvoids is the volume of voids inside a composite.

**S8.** **Evaluation of the ‘packing’ efficiency for CNT fibres in the composites**

Considering a 1-meter length CNT fibre with 0.028 tex and diameter of about 7 microns, the density could be calculated as:

SCNTF = π · r2 = 3.14 · 3.52 = 38.5 · 10-12 , m2 (8)

ρCNTF = MCNTF / VolCNTF = (0.028 · 10-3)/(1 · 38.5 · 10-12) = 0.73 , g/cm3  (9)

Then, taken into account density of the CNT bundles of 1.66 g/cm3, the void content within the fibre itself appears to be approximately 50%, which is very close to what we observed in our previous work [5]. It means, that the volume of resin occluded with the fibre is equal to volume occupied by CNT bundles within the fibre. Hence, 30-40% volume loading of CNT is relative to about 60-80% of the composite’s volume occupied by the CNT fibres (actual packing density), thus, we observe fibres packed very densely almost without visible regions of pure epoxy in-between them. In contrast, our previous work [4,7] has shown that for the composites containing of about 26-33 %wt carbon nanotubes, CNT fibres were not packed so tightly, with large regions of pure epoxy matrix observed between them (refer to Fig. 3 in [4], and Fig. 1 and 2 in [7]).

**S9. Recent results on high volume fraction epoxy composites**

Table S3 summarises the recent achievements in research on the epoxy nanocomposites filled with high amount of different CNT assemblies: papers, sheets, vertically aligned arrays, and fibres.

Table S3. Recent results on mechanical properties of high volume fraction epoxy composites

| **CNT assembly // treatment** | **Maximum reached CNT content** | **Impregnation technique** | **Observed porosity / voids** | **Tensile strength, MPa** | **Tensile stiffness, GPa** | **Literature source** |
| --- | --- | --- | --- | --- | --- | --- |
| CNT sheets/felts //  Chemical oxidation | 20% wt | Manual impregnation | No data | 75 – 80*  *for fraction  10-13% wt | 2.1 – 2.7* | Lopes P.E. et al. [8] |
| MWCNT-buckypapers //  Chemical oxidation | 49% wt | Filtering/  immersion in diluted epoxy-acetone solution | No data | 10 – 37**  **for fraction  10-17% wt | 2.5 – 3.5** | Spitalsky Z. et al. [9] |
| Super-aligned MWCNT sheets // No | 16.5% wt / 10.6% vol. | RTM | No micro voids / voids of handling | 231.5 | 20.4 | Cheng Q.F. et al. [10] |
| Vertically aligned CNT forest //  Mechanical densification | 20% vol | Immersion / capillary driven wetting | No micro voids / voids of handling | No data | No data | Wardle B. [11]  Cebeci H. et al. [12] |
| *Continuation on the next page* | | | | | | |

| **CNT assembly // treatment** | **Maximum reached CNT content** | **Impregnation technique** | **Observed porosity / voids** | **Tensile strength, MPa** | **Tensile stiffness, GPa** | **Literature source** | |
| --- | --- | --- | --- | --- | --- | --- | --- |
| CNT shear-pressed arrays //  No | 27% vol | Immersion in epoxy-acetone solution /  capillary driven wetting | No data | 300  for non-stretched | 15.0 for non-stretched | Bradford P. et al. [13] | |
| CNT sheets from vertically aligned arrays by a solid-state drawing and winding technique // Densification by spraying ethanol | 32.1% vol (non-stretched) | Hot-pressuring with epoxy resin sheets | No data | 211.5 for non-stretched | 54.1 for non-stretched | Nam T.H. et al. [14] | |
| CNT sheets from vertically-aligned forests by “Domino pushing” method // No | 67% wt | Immersion in pre-heated and degassed epoxy system followed by hot-pressuring for 2h | No data | 169 | 36 | Mecklenburg M. et al. [15] | |
| CNT film // in situ liquid-spraying of ethanol-water solution | 54.2% wt | Immersion in diluted epoxy-acetone solution | Excessive porosity with pore size 72-77 nm for 45-54.2%wt fraction composites | 405 for 45%wt  281 for 54.2% wt | 16.3 for 45% wt  11.4 for 54.2% wt | Li M. et al. [16] | |
| CNT fibres //  No | 22% wt / 27% vol | Manual impregnation | No data | 253 | 18.8 | Mora R.J. et al. [4]  *Previous results from this laboratory* |
| CNT fibres //  No | 60% wt /  40% vol | Manual impregnation | 3.5-21 %vol depending on CNT content | 445 for 35%vol fraction | 26.5 for 35%vol fraction | ***This work*** |

**S10. Some recent results on CNT fibres/yarns modification**

| **CNT assembly** | **Initial tensile strength, GPa** | **Initial tensile stiffness,**  **GPa** | **Post-treatment** | **Achieved tensile strength, GPa** | **Achieved tensile stiffness, GPa** | **Literature source** |
| --- | --- | --- | --- | --- | --- | --- |
| SWCNT fibres  Floating catalyst CVD | 0.55 – 0.80 | 9-15 | Epoxy infiltration + twisting | 0.9 – 1.6 | 30 – 50 | Ma et al. [17] |
| PVA infiltration + twisting | 0.7 – 1.3 | 20 – 35 |
| MWCNT yarn  Dry spinning from vertical arrays | 0.175 | 9.4 | Epoxy infiltration + pultrusion | 0.467 | 49 | Shimamura et al. [18] |
| MWCNT fibres  Floating catalyst CVD | 1.0 – 1.5 | 40 – 80 | 1.5-hexadiene infiltration + UV radiation | 1.5 – 3.0 (max 3.5) | 25 - 125 | Boncel et al. [19] |
| **Next generation CNT fibres**  **Floating catalyst CVD** | **1.5 – 2.0** | **60 – 100** | **–** | **–** | **–** | **Gspann et al. [3]** |

**S11. Three-point bend test of the T300 carbon fibre-composite**


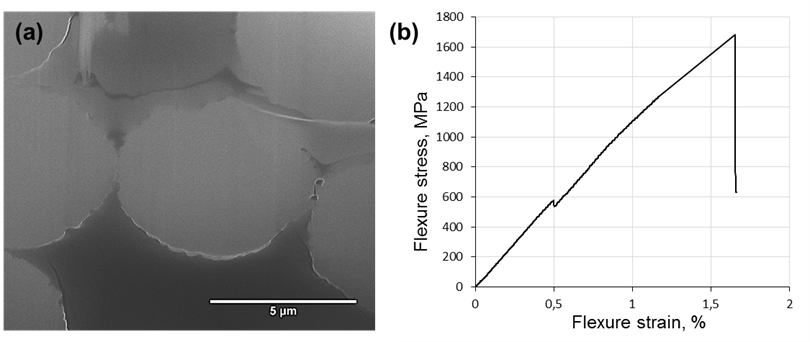


Fig. S7 – (a) FIB SEM cross-section image of the T300-composite (66% vol fraction) showing some detectable pores at the fibre-fibre and fibre-matrix interface; (b) the flexure stress-strain curve.

**References**:

[1]. He X, Gao W, Xie L, Ki B, Zhang Q, Lei S, Robinson JM, Haroz EH, Doorn SK, Wang W, Vajtai R, Ajayan PM, Adams WW, Hauge RH, Kono J. Wafer-scale monodomain films of spontaneously aligned single-walled carbon nanotubes. Nature Nanotechnology 2016; doi:10.1038/nnano.2016.44.

[2]. Duesberg GS, Loa I, Burghard M, Syassen K, Roth S. Polarized Raman spectroscopy on isolated single-wall carbon nanotubes. Phys Rev Lett 2000; 85(25):5436-5439. doi:10.1103/PhysRevLett.85.5436

[3]. Gspann TS, Smail FR, Windle AH. Spinning of carbon nanotube fibres using the floating catalyst high temperature route: purity issues and the critical role of sulphur. Faraday Discuss 2014; 173:47-65. doi:10.1039/C4FD00066H

[4]. Mora RJ, Vilatela JJ, Windle AH. Properties of composites of carbon nanotube fibres. Compos Sci Technol 2009; 69:1558-1563. doi:10.1016/j.compscitech.2008.11.038

[5]. Qiu J, Terrones J, Vilatela JJ, Vickers ME, Elliott JA, Windle AH. Liquid infiltration into carbon nanotube fibers: Effect on structure and electrical properties. ACS Nano 2013; 7:8412-8422. doi:10.1021/nn401337m

[6]. Vilatela JJ, Elliott JA, Windle AH. A model for the strength of yarn-like carbon nanotube fibers. ACS Nano 2011; 5(3):1921-1927. doi:10.1021/nn102925a

[7]. Vilatela JJ, Khare R, Windle AH. The hierarchical structure and properties of multifunctional carbon nanotube fibre composites. Carbon 2012; 50:1227-1234. doi:10.1016/j.carbon.2011.10.040

[8]. Lopes PE, Hattum F, Pereira CMC, Novoa PJRO, Forero S, Hepp F, et al. High CNT content composites with CNT buckypaper and epoxy resin matrix: Impregnation behaviour composite production and characterization. Compos Struct 2010; 92:1291-1298. doi:10.1016/j.compstruct.2009.11.003

[9]. Vilatela JJ, Khare R, Windle AH. The hierarchical structure and properties of multifunctional carbon nanotube fibre composites. Carbon 2012; 50:1227-1234. doi:10.1016/j.carbon.2011.10.040

[10]. Cheng QF, Wang JP, Wen JJ, Liu CH, Jiang KL, Li QQ, et al. Carbon nanotube/epoxy composites fabricated by resin transfer molding. Carbon 2010; 48:260-266. doi:10.1016/j.carbon.2009.09.014

[11]. Wardle BL, Saito DS, Garcia EJ, Hart AJ, Villoria RG, Verploegen EA. Fabrication and characterization of ultrahigh-volume-fraction aligned carbon nanotube-polymer composites. Adv Mater 2008; 999:1-8. doi:10.1002/adma.200800295

[12]. Cebeci H, Villoria RG, Hart AJ, Wardle BL. Multifunctional properties of high volume fraction aligned carbon nanotube polymer composites with controlled morphology. Compos Sci Technol 2009; 69:2649-2656. doi:10.1016/j.compscitech.2009.08.006

[13]. Bradford PD, Wang X, Zhao H, Maria JP, Jia Q, Zhu YT. A novel approach to fabricate high volume fraction nanocomposites with long aligned carbon nanotubes. Compos Sci Technol 2010; 70:1980-1985. doi:10.1016/j.compscitech.2010.07.020

[14]. Nam TH, Goto K, Nakayama H, Oshima K, Premalal V, Shimamura Y, et al. Effects of stretching on mechanical properties of aligned multi-walled carbon nanotube/epoxy composites. Composites Part A 2014; 64:194-202. doi:10.1016/j.compositesa.2014.05.013

[15]. Mecklenburg M, Mizushima D, Ohtake N, Bauhofer W, Fiedler B, Shulte K. On the manufacturing and electrical and mechanical properties of ultra-high wt.% fraction aligned MWCNT and randomly oriented CNT epoxy composites. Carbon 2015; 91:275-290. doi:10.1016/j.carbon.2015.04.085

[16]. Li M, Wang Z, Liu Q, Wang S, Gu Y, Li Z, et al. Carbon nanotube film / epoxy composites with high strength and toughness. Polym Compos 2015; doi:10.1002/pc.23617

[17]. Ma W, Liu L, Zhang Z, Yang R, Liu G, Zhang T, et al. High-strength composite fibres: realizing true potential of carbon nanotubes in polymer matrix through continuous reticulate architecture and molecular level couplings. Nano Letters 2009; 9(8):2855-2861. doi:10.1021/nl901035v

[18]. Shimamura Y, Oshima K, Tohgo K, Fujii T, Shirasu K, Yamamoto G, et al. Tensile mechanical properties of carbon nanotube/epoxy composite fabricated by pultrusion of carbon nanotube spun yarn preform. Composites Part A 2014; 62:32-38. doi:10.1016/j.compositesa.2014.03.011

[19]. Boncel S, Sundaram RM, Windle AH, Koziol KKK. Enhancement of the mechanical properties of directly spun CNT fibers by chemical treatment. ACS Nano 2011; 5(12):9339-9344. doi:10.1021/nn202685x

1. * Corresponding author

   Tel: +44 (0)1223 334 321

   Email address: ahw1@cam.ac.uk [↑](#footnote-ref-1)
